1

2           **Timing and causes of the distribution pattern of *Oncomelania***  
3                   ***hupensis* estimated by molecular and geologic data**

4

5   Wen-bin Ji<sup>2</sup>, Shu-xin Xu<sup>2</sup>, Jun Bai<sup>2</sup>, Ying-yi Cui<sup>2</sup>, Xian-min Zhou<sup>3</sup>, Jie-xin Zou<sup>1, 2 \*</sup>

6

7

8   <sup>1</sup>Department of Parasitology, School of Basic Medical Sciences, Nanchang University,

9   Nanchang, Jiangxi, PR China

10   <sup>2</sup>Research lab of Freshwater Crustacean Decapoda & Paragonimus, School of Basic Medical

11   Sciences, Nanchang University, Nanchang, Jiangxi, PR China

12   <sup>3</sup>Key Laboratory of Poyang Lake Environment and Resource Utilization, Ministry of

13   Education, Nanchang University, Nanchang, Jiangxi, PR China

14

15   \* Corresponding author

16   E-mail: [jxzou@ncu.edu.cn](mailto:jxzou@ncu.edu.cn) (JXZ)

17

18 **Abstract:**

19           As the only intermediate host of *Schistosoma japonicum*, *Oncomelania hupensis*  
20 plays an irreplaceable role in the prevalence of schistosomiasis japonica. Several living  
21 subspecies of *Oncomelania hupensis* are found in Asia, especially in China, Japan, the  
22 Philippines, and Sulawesi of Indonesia. The existing geographical distribution pattern of *O.*  
23 *hupensis* has been influenced by geological events. This study used existing mitochondrial  
24 gene data for *O. hupensis* in the GenBank database and the molecular clock method to  
25 estimate the divergence time of each subspecies of *O. hupensis*. For the first time, the timing  
26 and causes of the distribution pattern of the different *O. hupensis* subspecies were studied by  
27 combining molecular data with data on geologic events. The results showed that the uplift and  
28 isolation of the Qinghai-Tibet Plateau caused *Oncomelania hupensis robertsoni* to  
29 differentiate 4.76 Ma (Million anniversary), while *Oncomelania hupensis guangxiensis* was  
30 affected by the third Himalayan orogenic movement, differentiating 1.10 Ma. *Oncomelania*  
31 *hupensis nosophora* was influenced by the formation of the Yonaguni Strait and diverged  
32 1.43 Ma. Influenced by ice ages and interglacial periods, *Oncomelania hupensis tangi* and  
33 *Oncomelania hupensis formosana* diverged 0.57 Ma. The link of the ancient Yangtze River  
34 promoted the spread of *O. hupensis* to the middle and lower reaches of the Yangtze River,  
35 and the developed water network facilitated gene exchange among *Oncomelania hupensis*  
36 *hupensis* in the area. Eventually, 0.62 Ma, *O. h. hupensis* differentiated.

37

38 **Author summary**

39           Phylogenetic analysis of Pomatiopsidae species showed that *Oncomelania* was

40 isolated from other genera and clustered independently in phylogenetic trees. Further analysis  
41 of the species *Oncomelania hupensis* and its subspecies was performed. The snail species *O.*  
42 *hupensis* has multiple subspecies that exhibit certain differences. These subspecies are  
43 distributed across Asia, from China's Yunnan Province in the west to Japan in the east and  
44 south to the Philippines and Indonesia. In addition, the subspecies are widespread in the middle  
45 and lower reaches of the Yangtze River in China, and the distribution ranges of the different  
46 subspecies do not overlap. The formation of this distribution pattern of each subspecies of *O.*  
47 *hupensis* has a profound impact on the prevalence of *Schistosoma japonicum*. Therefore, the  
48 authors analyzed molecular data and geological historical events to investigate the timing and  
49 causes of the distribution pattern of each subspecies of *O. hupensis*.

50

## 51 **Introduction**

52 *Oncomelania hupensis* (Gredler, 1881) are dioecious, amphibious freshwater snails  
53 belonging to the phylum Mollusca, the class Gastropoda, the order Mesogastropoda, and the  
54 family Pomatiopsidae (Stimpson, 1865). *Oncomelania* (Gredler, 1881), as the only  
55 intermediate host of *Schistosoma japonicum* (Katsurada, 1904), plays an important role in the  
56 spread of *S. japonicum* [1, 2] and is now located in China, Japan, the Philippines and  
57 Indonesia [3].

58 As the only intermediate host of *Schistosoma japonicum*, the control and killing of  
59 *Oncomelania hupensis* will be the key link to block the transmission of schistosomiasis  
60 japonica. At present, the control and prevention of schistosomiasis japonica have made great  
61 progress [2, 4, 5], but researchers are still searching for more effective methods and tools [6,

62 7] to eliminate the prevalence of schistosomiasis japonica in the end [8]. The distribution of  
63 *Oncomelania hupensis* is overlapping with the endemic area of schistosomiasis japonica, and  
64 the transmission of *Oncomelania hupensis* will affect the prevalence of schistosomiasis  
65 japonica to some extent [9], so this paper thinks that the study of the distribution of  
66 *Oncomelania hupensis* and the cause and time of distribution pattern formation will be of  
67 significance to control the prevalence of schistosomiasis japonica.

68           Based on morphological data, G.M. Davis et al. [10] performed the first systematic  
69 classification of *Oncomelania* species. *Oncomelania* includes two species,  
70 *Oncomelania.minima* (Bartsch, 1936) and *O. hupensis*. *O. hupensis* comprises a total of six  
71 subspecies, including *Oncomelania hupensis chiui* (Habe & Miyazaki, 1962), *Oncomelania*  
72 *hupensis formosana* (Pilsbry & Hirase, 1905), *Oncomelania hupensis lindoensis* (Davis &  
73 Carney, 1973), *Oncomelania hupensis nosophora* (Robson, 1915), *Oncomelania hupensis*  
74 *quadrasi* (Möellendorff, 1895) and *Oncomelania hupensis hupensis*. Based on morphological  
75 classification, Yueying Liu et al. [11] suggested that the *O. hupensis* distributed on the  
76 Chinese mainland can be divided into five subspecies. Through molecular genetic analysis  
77 combined with morphological analysis, Yibiao Zhou et al. [12] proposed the classification of  
78 four subspecies of *O. hupensis*: *Oncomelania hupensis robertsoni* (Bartsch, 1936),  
79 *Oncomelania hupensis tangi* (Bartsch, 1936), *Oncomelania hupensis hupensis*, and  
80 *Oncomelania hupensis guangxiensis* (Liu et al., 1981). In the process of exploring novel  
81 microsatellite markers of *O. hupensis*, Xiaonong Zhou et al. [13] found that *O. hupensis* on  
82 mainland China exist in four different ecological environments: swamps and lakes in the  
83 Yangtze River basin, mountains and hills in the Sichuan and Yunnan provinces, coastal areas

84 in Fujian Province, and karst landforms in the Guangxi autonomous region, which is  
85 consistent with the classification of Zhou Yibiao et al.

86 The existing *O. hupensis* subspecies are distributed in Asia with a geographically  
87 isolated distribution pattern. There is no overlap of distribution [14], and there are different  
88 hypotheses that suggest that this distribution pattern is due to the spread and differentiation of  
89 *O. hupensis* and the influence of geological plate movement.

90 Hypothesis one: Based on morphological data, G.M. Davis et al. [10, 15]  
91 constructed the Pomatiopsidae phylogenetic atlas and an evolutionary tree, examined the  
92 distribution of the snails in river basins in Asia, and proposed that the snail ancestors lived on  
93 the Indian continental plate during the Mesozoic period. Davis further proposed that during  
94 the Himalaya orogeny, the snails entered new Yangtze River waters in the north of Mengmi  
95 and Yunnan and spread over the Pacific coast of China and to Japan; Taiwan Province; the  
96 Philippines; and Sulawesi in Indonesia. In 1995, Xiaonong Zhou et al. [16] proposed that the  
97 snails entered China's Yunnan Province earlier from Himalaya, then moved into the Sichuan  
98 plain and spread to the eastern coast of mainland China.

99 Hypothesis two: S.W. Attwood [17] thinks that proto-Pomatiopsidae came from  
100 northwest Australia (during the Jurassic period) on small continental fragments of  
101 Gondwanan origin. The continental fragments were involved in the formation of present-day  
102 Borneo and eastern Indonesia. During the Oligocene, the proto-Pomatiopsidae began to  
103 diverge from Borneo and eastern Indonesia, spreading north to Japan before the opening of  
104 the Sea of Japan and colonizing China and the mountains of western China.

105 The hypotheses above are based on speculated tectonic plate movement, and there

106 are some limitations. This study used GenBank data and bioinformatics methods, fossil ages,  
107 and the molecular clock method [18] to estimate the divergence times of existing *O. hupensis*  
108 subspecies. The divergence of the existing *O. hupensis* subspecies is discussed in the context  
109 of historical geological events. Thus, molecular data and information on geological events  
110 were used to verify the above hypotheses and to elucidate the migration and subspeciation of  
111 these snails.

112

## 113 **Data and methods**

114

### 115 **Data**

116 In the GenBank database, there were 26 mitochondrial genome sequences for *O.*  
117 *hupensis* in Asia (S1 Table), including those for the subspecies *O. h. nosophora*, *O. h.*  
118 *quadrasi*, *O. h. hupensis* and *O. h. robertsoni*. In addition, *O. h. chiui* had 11 COI gene  
119 sequences, and *O. h. formosana* had 3 COI gene sequences and 1 16S gene sequence,  
120 although these subspecies did not have mitochondrial gene sequences. No molecular data for  
121 *O. h. lindoensis* had been uploaded.

122

### 123 **Methods**

124

125 **Phylogenetic analysis based on 13 protein-coding genes (PCGs).** *Tricula hortensis*

126 (EU440735) was chosen as the outgroup. Mafft [19] software was used to compare the

127 sequences, and the Gblocks Server

128 ([http://molevol.cmima.csic.es/castresana/Gblocks\\_server.html](http://molevol.cmima.csic.es/castresana/Gblocks_server.html)) was used to select the  
129 conserved sequence area. The best-fitting evolutionary model in maximum likelihood (ML)  
130 analyses of the 13 PCGs was GTR+G+I, and it was selected using ModelGenerator [20]. This  
131 model was used in Mega 6.0 [21], and 1,000 bootstrap replicates were performed. For the  
132 Bayesian inference (BI) analyses, the best-fitting evolutionary model (GTR+G+I) was  
133 determined using MrModeltest 2.3 [22].

134           The BI analyses were performed with MrBayes 3.2.6 [23], which used the Markov  
135 chain Monte Carlo (MCMC) method with four chains to run 2 million generations. Sampling  
136 was performed every 1,000 generations, and the initial 500,000 steps were discarded as burn-  
137 in. The consensus BI trees were visualized using FigTree 1.4.0 software.

138

139 **Divergence time estimation based on molecular clock.** Upon searching for fossil ages in  
140 Gastropoda, we obtained the fossil age of the family Assimineidae (23 Ma-16 Ma) [24, 25].  
141 In the GenBank database, there are sequences for COI genes and 16S mitochondrial genes for  
142 four species in Assimineidae: *Angustassiminea satumana* (AB611803/AB611802), *Assiminea*  
143 *hiradoensis* (AB611807/AB611806), *Paludinellassiminea japonica* (AB611811/AB611810),  
144 and *Pseudomphala miyazakii* (AB611815/ AB61181). The fossil ages and gene sequences  
145 were used to estimate the subsequent fossil ages. *O. minim* also belongs to the genus  
146 *Oncomelania*, and *O. minima* had COI and 16S single gene data in the GenBank database  
147 (AB611791/AB611790, AB611795/AB611794, and DQ212795/DQ212858). *O. h. formosana*  
148 also had COI and 16S gene sequences (DQ112283/DQ212861), so *O. minima* and *O. h.*  
149 *formosana* were included in the estimation of divergence time. *O. h. chiui* and *O. h.*

150 *lindoensis* were not included in the divergence time estimate. To further improve the  
151 reliability of the divergence time estimation, GenBank COI and 16S gene sequences (S2  
152 Table) from the same individual source in the 14 genera and 31 species of Pomatiopsidae  
153 were also included.

154 We used the strict clock in BEAST v1.8.2 [26] software to estimate the divergence  
155 time of each subspecies based on the COI and 16S sequences and selected a normal prior  
156 distribution. The best-fitting evolutionary model in ModelGenerator [20] software was  
157 GTR+G+I, and the Yule process was used for the tree prior with a random starting tree. In  
158 total, 20,000,000 generations were run, and the parameters were logged every 20,000  
159 generations, with the first 10% discarded as burn-in. TreeAnnotator v1.8.2 software was used  
160 to generate the tree, and the divergence time was visualized using FigTree 1.4.0 software.

161

## 162 **Results and discussion**

163

### 164 **Phylogenetic relationships and classification**

165 The occurrence tree showed that 26 of the *O. hupensis* sequences were grouped into  
166 6 branches according to subspecies(Fig1). The 6 subspecies were *O. h. hupensis*, *O. h. tangi*,  
167 *O. h. guangxiensis*, *O. h. nosophora*, *O. h. quadrasi* and *O. h. robertsoni*, which conform to  
168 the subspecies classification system proposed by G.M.Davis [10,27] and Yibiao Zhou [12].

169

170 **Fig 1: Maximum likelihood (ML) phylogenetic tree of *Oncomelania hupensis* and related**  
171 **brachyurans based on 13 PCG sequences from the mitochondrial genome.***Tricula*



172 *hortensis* serves as the outgroup. The numbers at the internodes are ML bootstrap  
173 probabilities and Bayesian inference (BI) posterior probabilities. The differences between the  
174 ML and BI trees are indicated by ‘\*’. The scale bars represent the genetic distance.

175

## 176 **Divergence time estimation**

177 The existing research results show that the subfamily Triculinae of Pomatiopsidae is  
178 mainly distributed in Southeast Asia, and the differentiation of the species is closely related to  
179 the temporal variation of the geologic events in the distribution area [28], which are closely  
180 related to the results of this paper. Although *Oncomelania* is now classified as part of  
181 Pomatiopsidae, the molecular clock (Fig 2) estimates show that *Oncomelania* species  
182 diverged at 12.41Ma, earlier than the rest of the included species in the family, suggesting the  
183 independence of *Oncomelania*. This paper will focus on the differences in the divergence  
184 times of *Oncomelania* species and on the divergence events.

185

186 **Fig 2: Divergence time of Pomatiopsidae based on the COI and 16S sequences of the**  
187 **mitochondrial genome.** The scale bars represent millions of years from the present.

188

189 Combining the molecular clock calculation results based on the COI and 16S gene  
190 sequences and corresponding periods of geological events, this article on the timing and cause  
191 of *Oncomelania* species (subspecies) migration and differentiation makes the following  
192 speculation (Fig 3):

193

194 **Fig 3: Distribution and differentiation of *Oncomelania* in Asia.** The regional map of Asia

195 comes from [https://commons.wikimedia.org/wiki/Atlas\\_of\\_the\\_world](https://commons.wikimedia.org/wiki/Atlas_of_the_world) and

196 <http://landsatlook.usgs.gov/>; the map edited with Adobe Photoshop CS6.

197 Ma (Million anniversary).

198

199 The ancestors of *O. hupensis* were distributed on the Asian continent. During the

200 period from 23 Ma to 15 Ma [29], the Sea of Japan opened, and the Japanese islands

201 gradually separated from the Asian continent, resulting in geographical isolation and a new

202 ecological environment. Thus, 10.58 Ma (95% confidence interval = 7.34-14.07 Ma), *O.*

203 *minima* diverged. This may be a major cause of the current distribution of *O. minima* in

204 Honshu, Japan, while the snails on the Asian continent are differentiated into different

205 subspecies of *O. hupensis*.

206 On the Asian continent, approximately 60-50 Ma [30], the Indian Ocean Plate and

207 the Eurasian Plate began to collide and cause the Qinghai-Tibet Plateau to uplift. The uplift of

208 the Qinghai-Tibet Plateau was not a rapid process but rather proceeded through different

209 stages. After the plate collision, the strong uplift began 3.4 Ma [31]. The results show that the

210 divergence time of *O. h. robertsoni* was 4.76 Ma (95% confidence interval = 2.44-4.98 Ma),

211 which is close to the stage of strong uplift. With the elevation of the Qinghai-Tibet Plateau,

212 the change in climate [32], the change in ecological environment, and the development of

213 geographical isolation, the snail species gradually differentiated in this location, producing *O.*

214 *h. robertsoni*. In addition, we found that the divergence time of *S. japonicum* was

215 approximately 3.8 Ma [33, 34], close to the divergence time of *O. h. robertsoni*, which may

216 represent the beginning of the parasitic relationship between *S. japonicum* and *O. hupensis*  
217 [35]. When *S. japonicum* began to live in the snail body and whether there was a symbiotic  
218 relationship between the species remains to be elucidated.

219           The Quaternary glaciation (2.58 Ma) has included four ice ages (1.50-1.10 Ma,  
220 0.90-0.40 Ma, 0.20-0.11 Ma, and 0.01-0.00 Ma) [36, 37] and interglacial periods. The results  
221 of this study show that the divergence time of *O. h. formosana* in Taiwan Province and *O. h.*  
222 *tangi* in Fujian Province was 0.62 Ma (95% confidence interval = 0.40-0.85 Ma), which  
223 coincides with the separation of the island of Taiwan from the continent due to the transition  
224 of an ice age into an interglacial period. There is reason to believe that the formation of *O. h.*  
225 *formosana* and *O. h. tangi* was affected by such a transition. The island of Taiwan and the  
226 mainland were connected during the ice age, and the *O. hupensis* in the two places were able  
227 to carry out gene exchange. During the interglacial periods, the island of Taiwan was again  
228 separated from the mainland, reestablishing geographical isolation, and *O. h. formosana* and  
229 *O. h. tangi* eventually diverged.

230           The formation of the Yonaguni Strait 1.55 Ma led to the separation of the island of  
231 Taiwan from the Japanese islands [38]. The results suggest that the divergence time of *O. h.*  
232 *nosophora* in Japan was 1.43 Ma (95% confidence interval = 0.90-2.00 Ma), which coincides  
233 with the separation of the island of Taiwan from the islands of Japan. It is reasonable to  
234 assume that the geographical isolation caused by the strait facilitated the formation of *O. h.*  
235 *nosophora*.

236           In this study, the divergence time of *O. h. guangxiensis* was found to be 1.10 Ma  
237 (95% confidence interval = 0.70-1.55 Ma). Guangxi is located on the southeast edge of the

238 Qinghai-Tibet Plateau and was affected by the third Himalayan orogenic movement (starting  
239 2.4 Ma) [39, 40]; geological activity and further geologic changes produced geographic  
240 isolation and eventually resulted in the differentiation of *O. h. guangxiensis*.

241           The uplift of the Qinghai-Tibet Plateau caused the ancient Yangtze River to  
242 penetrate from west to east during the period from 2.6 to 2.0 Ma [41]. The developed water  
243 network of the ancient Yangtze River basin strongly aided the spread of the snails to the  
244 middle and lower reaches of the Yangtze River, which had their own network and provided a  
245 broad living space for the multiplication and differentiation of *O. hupensis*, thus forming the  
246 named subspecies *O. h. hupensis* as the largest group. The changes in the Yangtze River  
247 coincide with the divergence time of this subspecies, 0.62 Ma (95% confidence interval =  
248 0.40-0.85 Ma).

249           The divergence time of *O. h. quadrasi* was 3.70 Ma (95% confidence interval =  
250 2.44-4.98 Ma), and there are no corresponding geological events to explain the cause of the  
251 differentiation. However, according to the two factors of *O. h. robertsoni* and the carrying of  
252 *S. japonicum*, it is reasonable to infer that *O. h. quadrasi* originated from *O. h. robertsoni*.

253

## 254 **Conclusion**

255           Through analysis of the molecular clock results and of molecular data and geologic  
256 events, the timing and causes of the distribution pattern of the different *O. hupensis*  
257 subspecies were studied for the first time. We speculate that the isolation of the Japanese  
258 islands from the mainland caused *O. minima* to differentiate 10.58 Ma and that the isolation  
259 caused by the uplift of the Qinghai-Tibet Plateau 4.76 Ma caused *O. h. robertsoni* to

260 differentiate. Upon the west-to-east formation of the river, geological changes and changes in  
261 the river influenced the beginning of the differentiation of the various existing subspecies of  
262 *O. hupensis*. Among them, *O. h. guangxiensis* was affected by the third Himalayan orogenic  
263 movement and differentiated 1.10 Ma. Influenced by the formation of the Yonaguni Strait, *O.*  
264 *h. nosophora* differentiated 1.43 Ma, while 0.57 Ma, *O. h. tangi* and *O. h. formosana*  
265 diverged under the influence of four ice ages and interglacial periods. The link of the ancient  
266 Yangtze River promoted the spread of *O. hupensis* to the middle and lower reaches of the  
267 Yangtze River, and the developed water network facilitated the gene exchange of *O. hupensis*  
268 in the area; the most numerous and most widely distributed subspecies, *O. h. hupensis*,  
269 diverged 0.62 Ma.

270

## 271 **Acknowledgments**

272 The authors thank the guidance provided by Xiaonong Zhou, Director of the National institute  
273 of parasitic diseases Chinese Center For Disease Control And Prevention (NIPD) for this  
274 article.

275

## 276 **References**

- 277 1. Zhou YB, Liang S, Chen Y, Jiang QW. The Three Gorges Dam: Does it accelerate or delay the  
278 progress towards eliminating transmission of schistosomiasis in China? *Infect Dis Poverty*. 2016;5(1):63.  
279 Epub 2016/07/06. doi: 10.1186/s40249-016-0156-3. PubMed PMID: 27377962; PubMed Central PMCID:  
280 PMCPMC4932735.
- 281 2. Lu XT, Gu QY, Limpanont Y, Song LG, Wu ZD, Okanurak K, et al. Snail-borne parasitic diseases: an  
282 update on global epidemiological distribution, transmission interruption and control methods. *Infect*  
283 *Dis Poverty*. 2018;7(1):28. Epub 2018/04/10. doi: 10.1186/s40249-018-0414-7. PubMed PMID:  
284 29628017; PubMed Central PMCID: PMCPMC5890347.
- 285 3. Davis GM. The origin and evolution of the gastropod Family Pomatiopsidae, with emphasis on the  
286 Mekong River Triculinae. *Academy of Natural Sciences of Philadelphia Monograph*. 1979;20(1):115.

- 287 4. Zheng Q, Vanderslott S, Jiang B, Xu LL, Liu CS, Huo LL, et al. Research gaps for three main tropical  
288 diseases in the People's Republic of China. *Infect Dis Poverty*. 2013;2(1):15. Epub 2013/07/31. doi:  
289 10.1186/2049-9957-2-15. PubMed PMID: 23895635; PubMed Central PMCID: PMC3751495.
- 290 5. Sun LP, Wang W, Hong QB, Li SZ, Liang YS, Yang HT, et al. Approaches being used in the national  
291 schistosomiasis elimination programme in China: a review. *Infect Dis Poverty*. 2017;6(1):55. Epub  
292 2017/03/16. doi: 10.1186/s40249-017-0271-9. PubMed PMID: 28292327; PubMed Central PMCID:  
293 PMC5351197.
- 294 6. Sun LP, Wang W, Zuo YP, Hong QB, Du GL, Ma YC, et al. A multidisciplinary, integrated approach  
295 for the elimination of schistosomiasis: a longitudinal study in a historically hyper-endemic region in the  
296 lower reaches of the Yangtze River, China from 2005 to 2014. *Infect Dis Poverty*. 2017;6(1):56. Epub  
297 2017/03/16. doi: 10.1186/s40249-017-0270-x. PubMed PMID: 28288689; PubMed Central PMCID:  
298 PMC5348877.
- 299 7. Sun LP, Wang W, Zuo YP, Zhang ZQ, Hong QB, Yang GJ, et al. An integrated environmental  
300 improvement of marshlands: impact on control and elimination of schistosomiasis in marshland regions  
301 along the Yangtze River, China. *Infect Dis Poverty*. 2017;6(1):72. Epub 2017/03/24. doi:  
302 10.1186/s40249-017-0287-1. PubMed PMID: 28330510; PubMed Central PMCID: PMC5361825.
- 303 8. Bergquist R, Zhou XN, Rollinson D, Reinhard-Rupp J, Klohe K. Elimination of schistosomiasis: the  
304 tools required. *Infect Dis Poverty*. 2017;6(1):158. Epub 2017/11/21. doi: 10.1186/s40249-017-0370-7.  
305 PubMed PMID: 29151362; PubMed Central PMCID: PMC5694902.
- 306 9. Liu Y, Zhong B, Wu ZS, Liang S, Qiu DC, Ma X. Interruption of schistosomiasis transmission in  
307 mountainous and hilly regions with an integrated strategy: a longitudinal case study in Sichuan, China.  
308 *Infect Dis Poverty*. 2017;6(1):79. Epub 2017/04/08. doi: 10.1186/s40249-017-0290-6. PubMed PMID:  
309 28385163; PubMed Central PMCID: PMC5383976.
- 310 10. Davis GM, Sornmani S. Snail hosts of Asian *Schistosoma* infecting man: evolution and coevolution.  
311 1980:195-238.
- 312 11. Liu Yue-Ying, Lou Tze-Kong, Wang Yao-Xian, Zhang Wen-Zhen. Subspecific differentiation of  
313 oncomelaniid snails. *Zoological Systematics*. 1981;(3):31-45.
- 314 12. Zhou Yibiao, Jiang Qingwu, Zhao Genming, Yuan Hongchang. Subspecies differentiation of  
315 *Oncomelania hupensis* from Mainland China. *Chinese Journal of Schistosomiasis Control*.  
316 2007;19(6):485-7.
- 317 13. Zhang L, Li S, Wang Q, Qian Y, Liu Q, Yang P, et al. Isolation and characterization of 15 new  
318 microsatellite markers in *Oncomelania hupensis*, the snail intermediate host of *Schistosoma japonicum*  
319 in mainland China. *Int J Mol Sci*. 2012;13(5):5844-50. Epub 2012/07/04. doi: 10.3390/ijms13055844.  
320 PubMed PMID: 22754335; PubMed Central PMCID: PMC3382821.
- 321 14. Zhou Xiaonong. Science on *Oncomelania* Snail: Science Press; 2005.
- 322 15. Davis GM. Evolution of prosobranch snails transmitting Asian *Schistosoma*; coevolution with  
323 *Schistosoma*: a review. *Prog Clin Parasitol*. 1993;3:145-204. Epub 1993/01/01. PubMed PMID: 8420602.
- 324 16. Zhou Xiaonong, Sun Leping, Hong Qingbiao, Xu Qiu, Wu Zhongxing, Lu Ansheng, et al. POPULATION  
325 GENETICS OF *ONCOMELANIA* SPP. IN MAINLAND CHINA I. GENETIC VARIATIONS AMONG POPULATIONS  
326 OF *ONCOMELANIA* SPP. *Chinese Journal of Schistosomiasis Control*. 1995;(2):67-71.
- 327 17. Attwood SW. Mekong Schistosomiasis: Where Did It Come from and Where Is It Going? 2009. doi:  
328 10.1016/B978-0-12-374026-7.00011-5.
- 329 18. Tang X, Lai X, Yang Z, Tao LI, Yang S. HYPOTHESIS OF MOLECULAR CLOCK AND FOSSIL RECORD A  
330 REVIEW. *Earth Science Frontiers*. 2002;9(2):465-73.

- 331 19. Katoh K, Kuma K, Toh H, Miyata T. MAFFT version 5: improvement in accuracy of multiple  
332 sequence alignment. *Nucleic Acids Res.* 2005;33(2):511-8. Epub 2005/01/22. doi: 10.1093/nar/gki198.  
333 PubMed PMID: 15661851; PubMed Central PMCID: PMCPMC548345.
- 334 20. Vazquez GE, Ponzoni I, Sánchez MC, Brignole NB. ModGen: a model generator for instrumentation  
335 analysis. *Advances in Engineering Software.* 2001;32(1):37-48. doi: [https://doi.org/10.1016/S0965-](https://doi.org/10.1016/S0965-9978(00)00073-9)  
336 9978(00)00073-9.
- 337 21. Tamura K, Stecher G, Peterson D, Filipiński A, Kumar S. MEGA6: Molecular Evolutionary Genetics  
338 Analysis version 6.0. *Molecular biology and evolution.* 2013;30(12):2725-9. Epub 2013/10/18. doi:  
339 10.1093/molbev/mst197. PubMed PMID: 24132122; PubMed Central PMCID: PMCPMC3840312.
- 340 22. Nylander JAA, Zooloogy S, Posada D, Mrmodeltest R, Os F. MrModeltest 2.3 README, May 22 2008.  
341 2008.
- 342 23. Ronquist F, Teslenko M, van der Mark P, Ayres DL, Darling A, Höhna S, et al. MrBayes 3.2: efficient  
343 Bayesian phylogenetic inference and model choice across a large model space. *Syst Biol.*  
344 2012;61(3):539-42. Epub 2012/02/24. doi: 10.1093/sysbio/sys029. PubMed PMID: 22357727; PubMed  
345 Central PMCID: PMCPMC3329765.
- 346 24. Palmm. Mollusks of the Tampa and Suwannee limestones of Florida. 1937.
- 347 25. Ladd HS. Chitons and gastropods (Haliotidae through Adeorbidae) from the wester Pacific islands.  
348 United States Geological Survey Professional Paper. 1966;531.
- 349 26. Drummond AJ, Rambaut A. BEAST: Bayesian evolutionary analysis by sampling trees. *BMC Evol*  
350 *Biol.* 2007;7:214. Epub 2007/11/13. doi: 10.1186/1471-2148-7-214. PubMed PMID: 17996036; PubMed  
351 Central PMCID: PMCPMC2247476.
- 352 27. Davis GM, Zhang Y, Guo Y, Spolsky C. SYSTEMATIC STATUS OF *ONCOMELANIA HUPENSIS*  
353 (GASTROPODA: POMATIOPSIDAE) THROUGHOUT CHINA. *Studia Marina Sinica.* 1997;37(1):133-56.
- 354 28. Liu L, Huo GN, He HB, Zhou B, Attwood SW. A phylogeny for the pomatiopsidae (Gastropoda:  
355 Rissooidea): a resource for taxonomic, parasitological and biodiversity studies. *BMC Evol Biol.*  
356 2014;14(1):29. Epub 2014/02/20. doi: 10.1186/1471-2148-14-29. PubMed PMID: 24548800; PubMed  
357 Central PMCID: PMCPMC4016560.
- 358 29. Hall R. The plate tectonics of Cenozoic SE Asia and the distribution of land and sea. *Biogeography*  
359 *& Geological Evolution of Se Asia.* 1998.
- 360 30. LI Yong, HOU Zhong-jian, SI Guang-Ying, A.L.Densmore, Zhou Rong-jun, M.A.Ellis, et al. Cenozoic  
361 tectonic sequence and tectonic events at the eastern margin of the Qinghai-Tibet plateau. *Geology in*  
362 *China.* 2002;29(1):30-6.
- 363 31. Pan Baotian, Li Jijun, Zhu Junjie, Cao Jixiu. Qinghai — Xizang (Tibetan) Plateau: A Driver and  
364 Amplifier of Global Climatic Changes II. Uplift Processes of the Qinghai — Xizang (Tibetan) Plateau.  
365 *Journal of Lanzhou University.* 1996;(1).
- 366 32. Zhisheng A, Kutzbach JE, Prell WL, Porter SC. Evolution of Asian monsoons and phased uplift of the  
367 Himalaya-Tibetan plateau since Late Miocene times. *Nature.* 2001;411(6833):62-6. Epub 2001/05/03.  
368 doi: 10.1038/35075035. PubMed PMID: 11333976.
- 369 33. Attwood SW, Fatih FA, Upatham ES. DNA-sequence variation among *Schistosoma mekongi*  
370 populations and related taxa; phylogeography and the current distribution of Asian schistosomiasis.  
371 *PLoS Negl Trop Dis.* 2008;2(3):e200. Epub 2008/03/20. doi: 10.1371/journal.pntd.0000200. PubMed  
372 PMID: 18350111; PubMed Central PMCID: PMCPMC2265426.

- 373 34. Yin M, Zheng HX, Su J, Feng Z, McManus DP, Zhou XN, et al. Co-dispersal of the blood fluke  
374 *Schistosoma japonicum* and *Homo sapiens* in the Neolithic Age. *Sci Rep.* 2015;5:18058. Epub  
375 2015/12/22. doi: 10.1038/srep18058. PubMed PMID: 26686813; PubMed Central PMCID:  
376 PMC4685303.
- 377 35. Attwood SW, Ibaraki M, Saitoh Y, Nihei N, Janies DA. Comparative Phylogenetic Studies on  
378 *Schistosoma japonicum* and Its Snail Intermediate Host *Oncomelania hupensis*: Origins, Dispersal and  
379 Coevolution. *PLoS Negl Trop Dis.* 2015;9(7):e0003935. Epub 2015/08/01. doi:  
380 10.1371/journal.pntd.0003935. PubMed PMID: 26230619; PubMed Central PMCID: PMC4521948.
- 381 36. Zhao Z. A PRELIMINARY STUDY ON THE EVOLUTION OF TAIWAN STRAIT. *Journal of Oceanography*  
382 *in Taiwan Strait.* 1982.
- 383 37. Jia XN, Xu SX, Bai J, Wang YF, Nie ZH, Zhu CC, et al. The complete mitochondrial genome of  
384 *Somanniathelphusa boyangensis* and phylogenetic analysis of Genus *Somanniathelphusa* (Crustacea:  
385 Decapoda: Parathelphusidae). *PLoS One.* 2018;13(2):e0192601. Epub 2018/02/14. doi:  
386 10.1371/journal.pone.0192601. PubMed PMID: 29438407; PubMed Central PMCID: PMC5810993.
- 387 38. Karasawa S, Nagata S, Aoki J, Yahata K, Honda M. Phylogeographic Study of Whip Scorpions  
388 (Chelicerata: Arachnida: Thelyphonida) in Japan and Taiwan. *Zoolog Sci.* 2015;32(4):352-63. Epub  
389 2015/08/08. doi: 10.2108/zs140263. PubMed PMID: 26245222.
- 390 39. Huang TK, R TC. On Major Tectonic Forms of China. *Journal of Geology.* 1947;55.
- 391 40. Jia Chengzao, He Dengfa, Lu Jiemin. Episodes and geodynamic setting of Himalayan movement in  
392 China. *Oil & Gas Geology.* 2004;25(2):121-5.
- 393 41. Shu Qiang, Maoheng Z, Zhijun Z, Chen Ye, Jijun L. SEDIMENTARY RECORD FROM THE XH-1 CORE  
394 IN NORTH JIANGSU BASIN AND ITS IMPLICATION ON THE YANGTZE RIVER RUN-THROUGH TIME. *Journal*  
395 *of Stratigraphy.* 2008;32(3):81-7.

## 396 **Supporting information**

### 397 **S1 Table. Mitochondrial genome data for *Oncomelania hupensis* in GenBank**

398 **(as of August 7, 2018).** \*indicates that the sequence upload did not add the sample source to  
399 GenBank.

### 400 **S2 Table. Partial COI and 16S genes of 14 genera and 31 species in Pomatiopsidae from**

401 **GenBank (as of August 7, 2018).** \*indicates that the sequences are from the same  
402 mitochondrial genome.



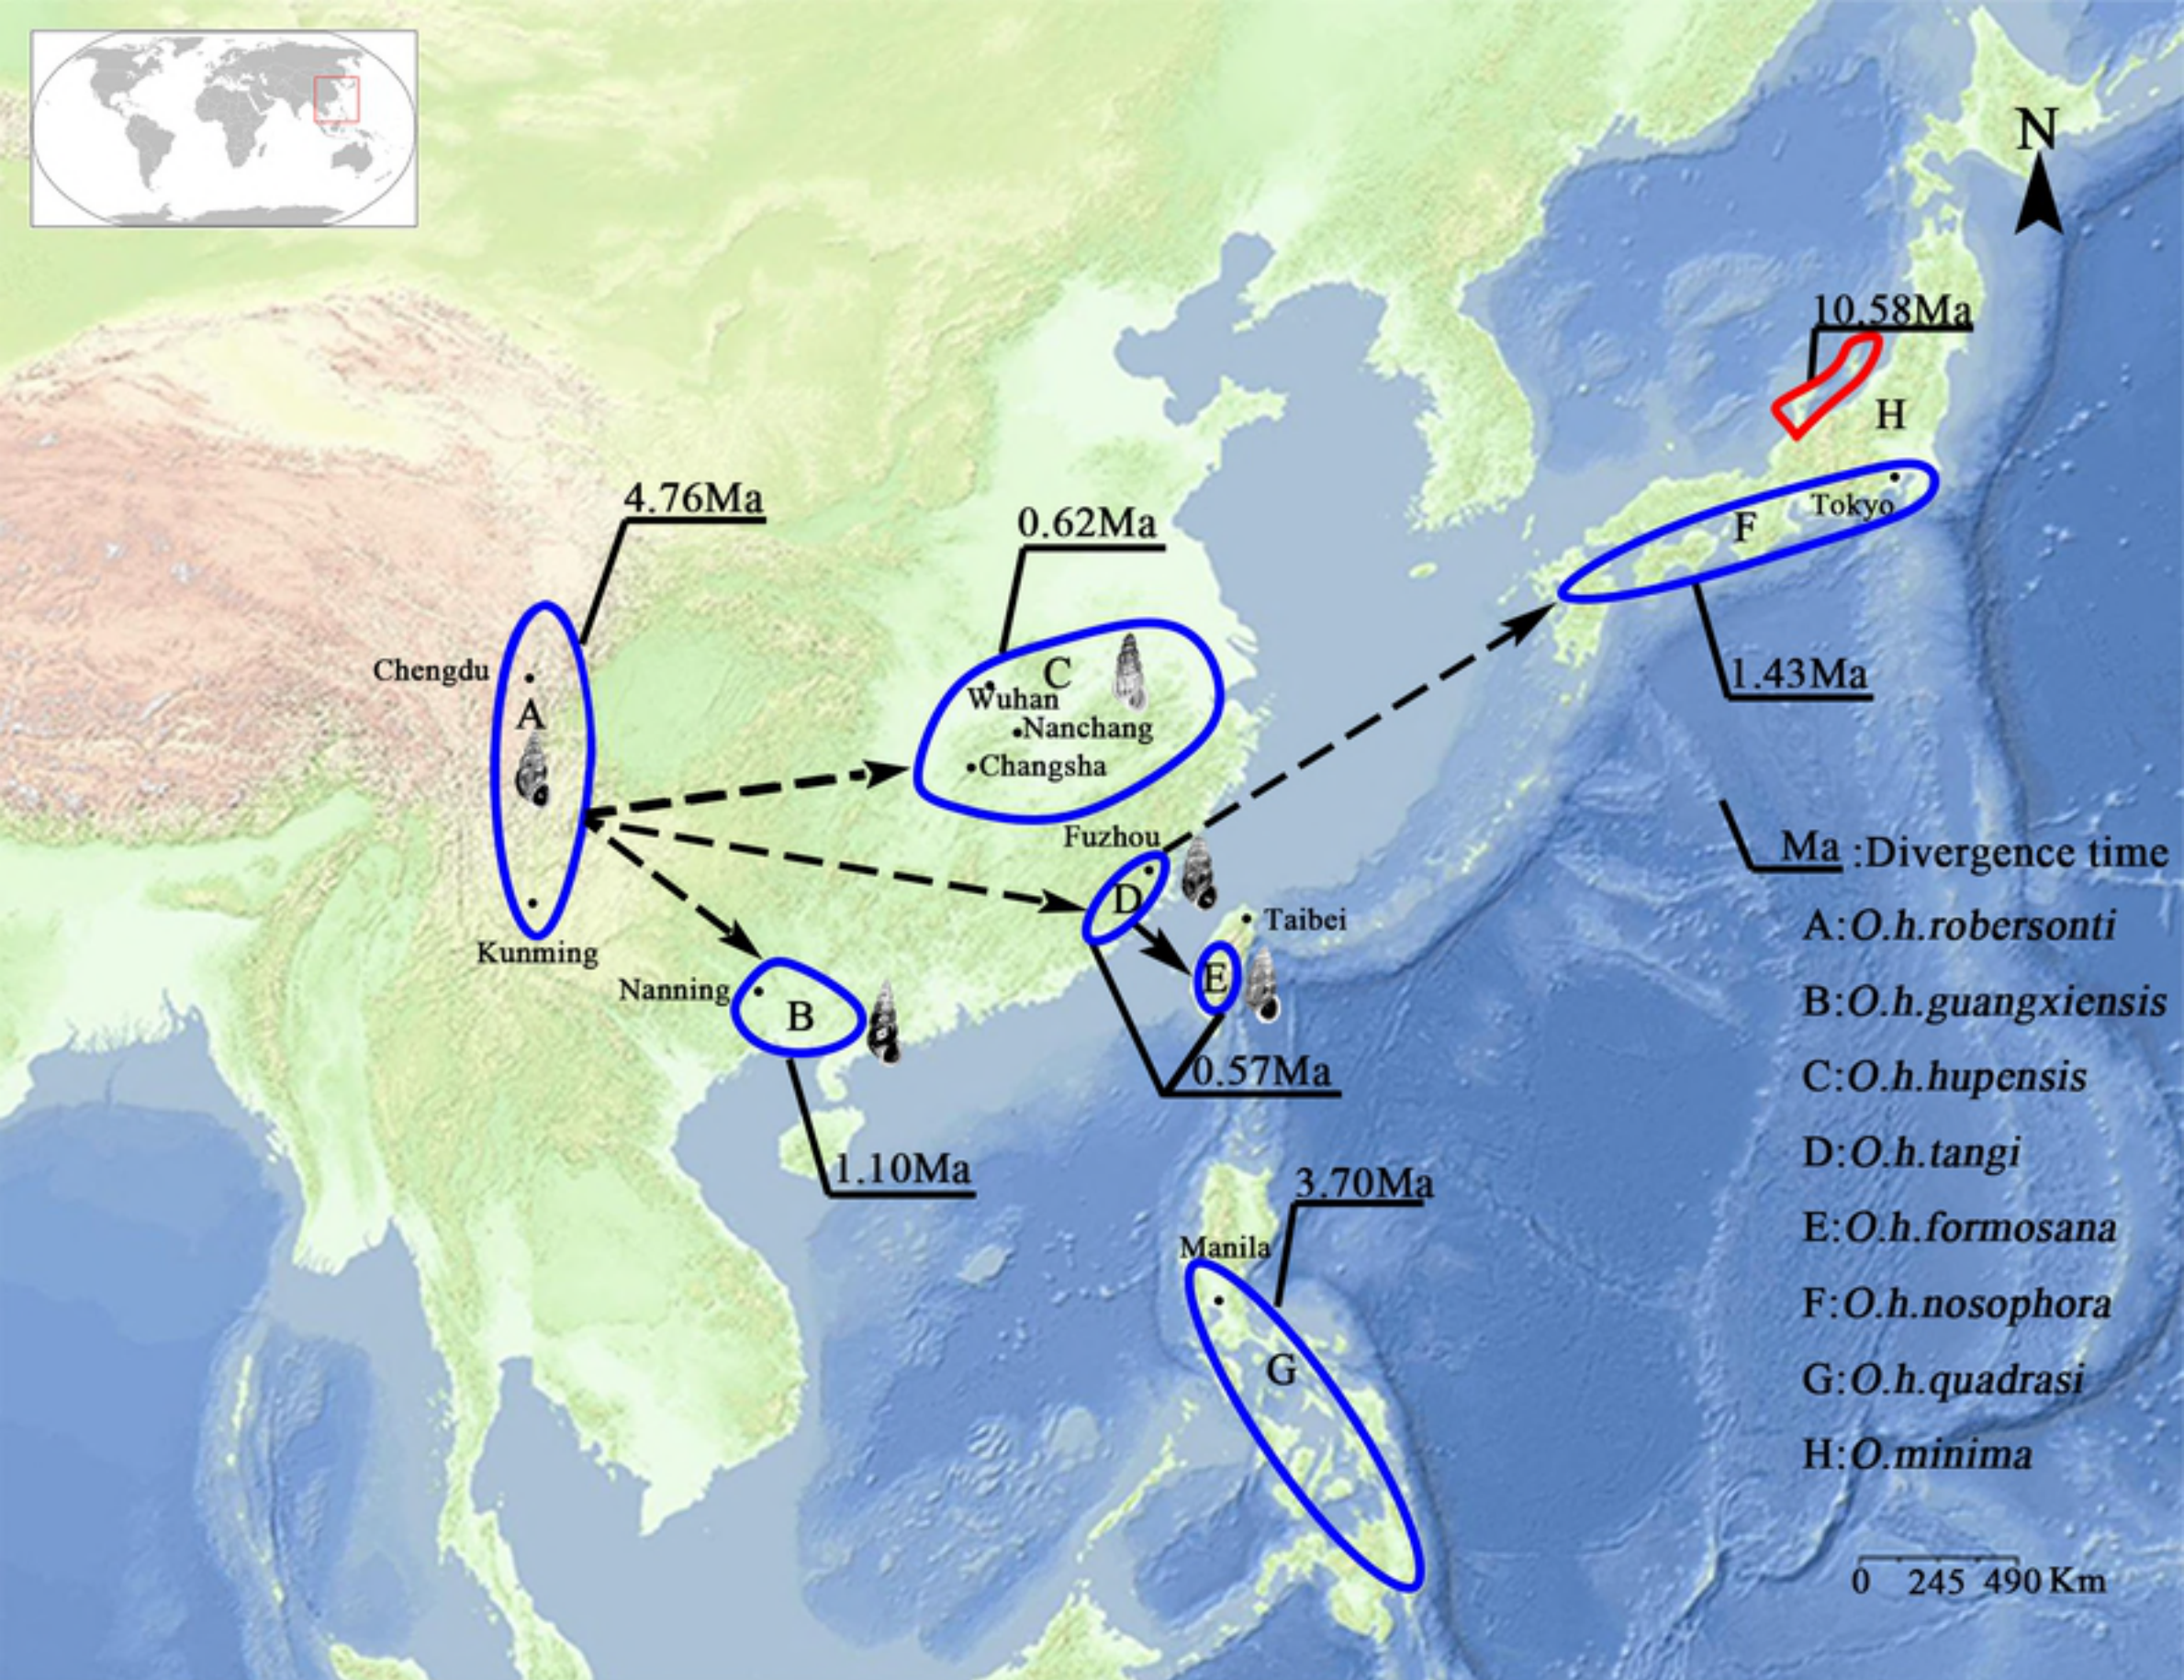

Fig3

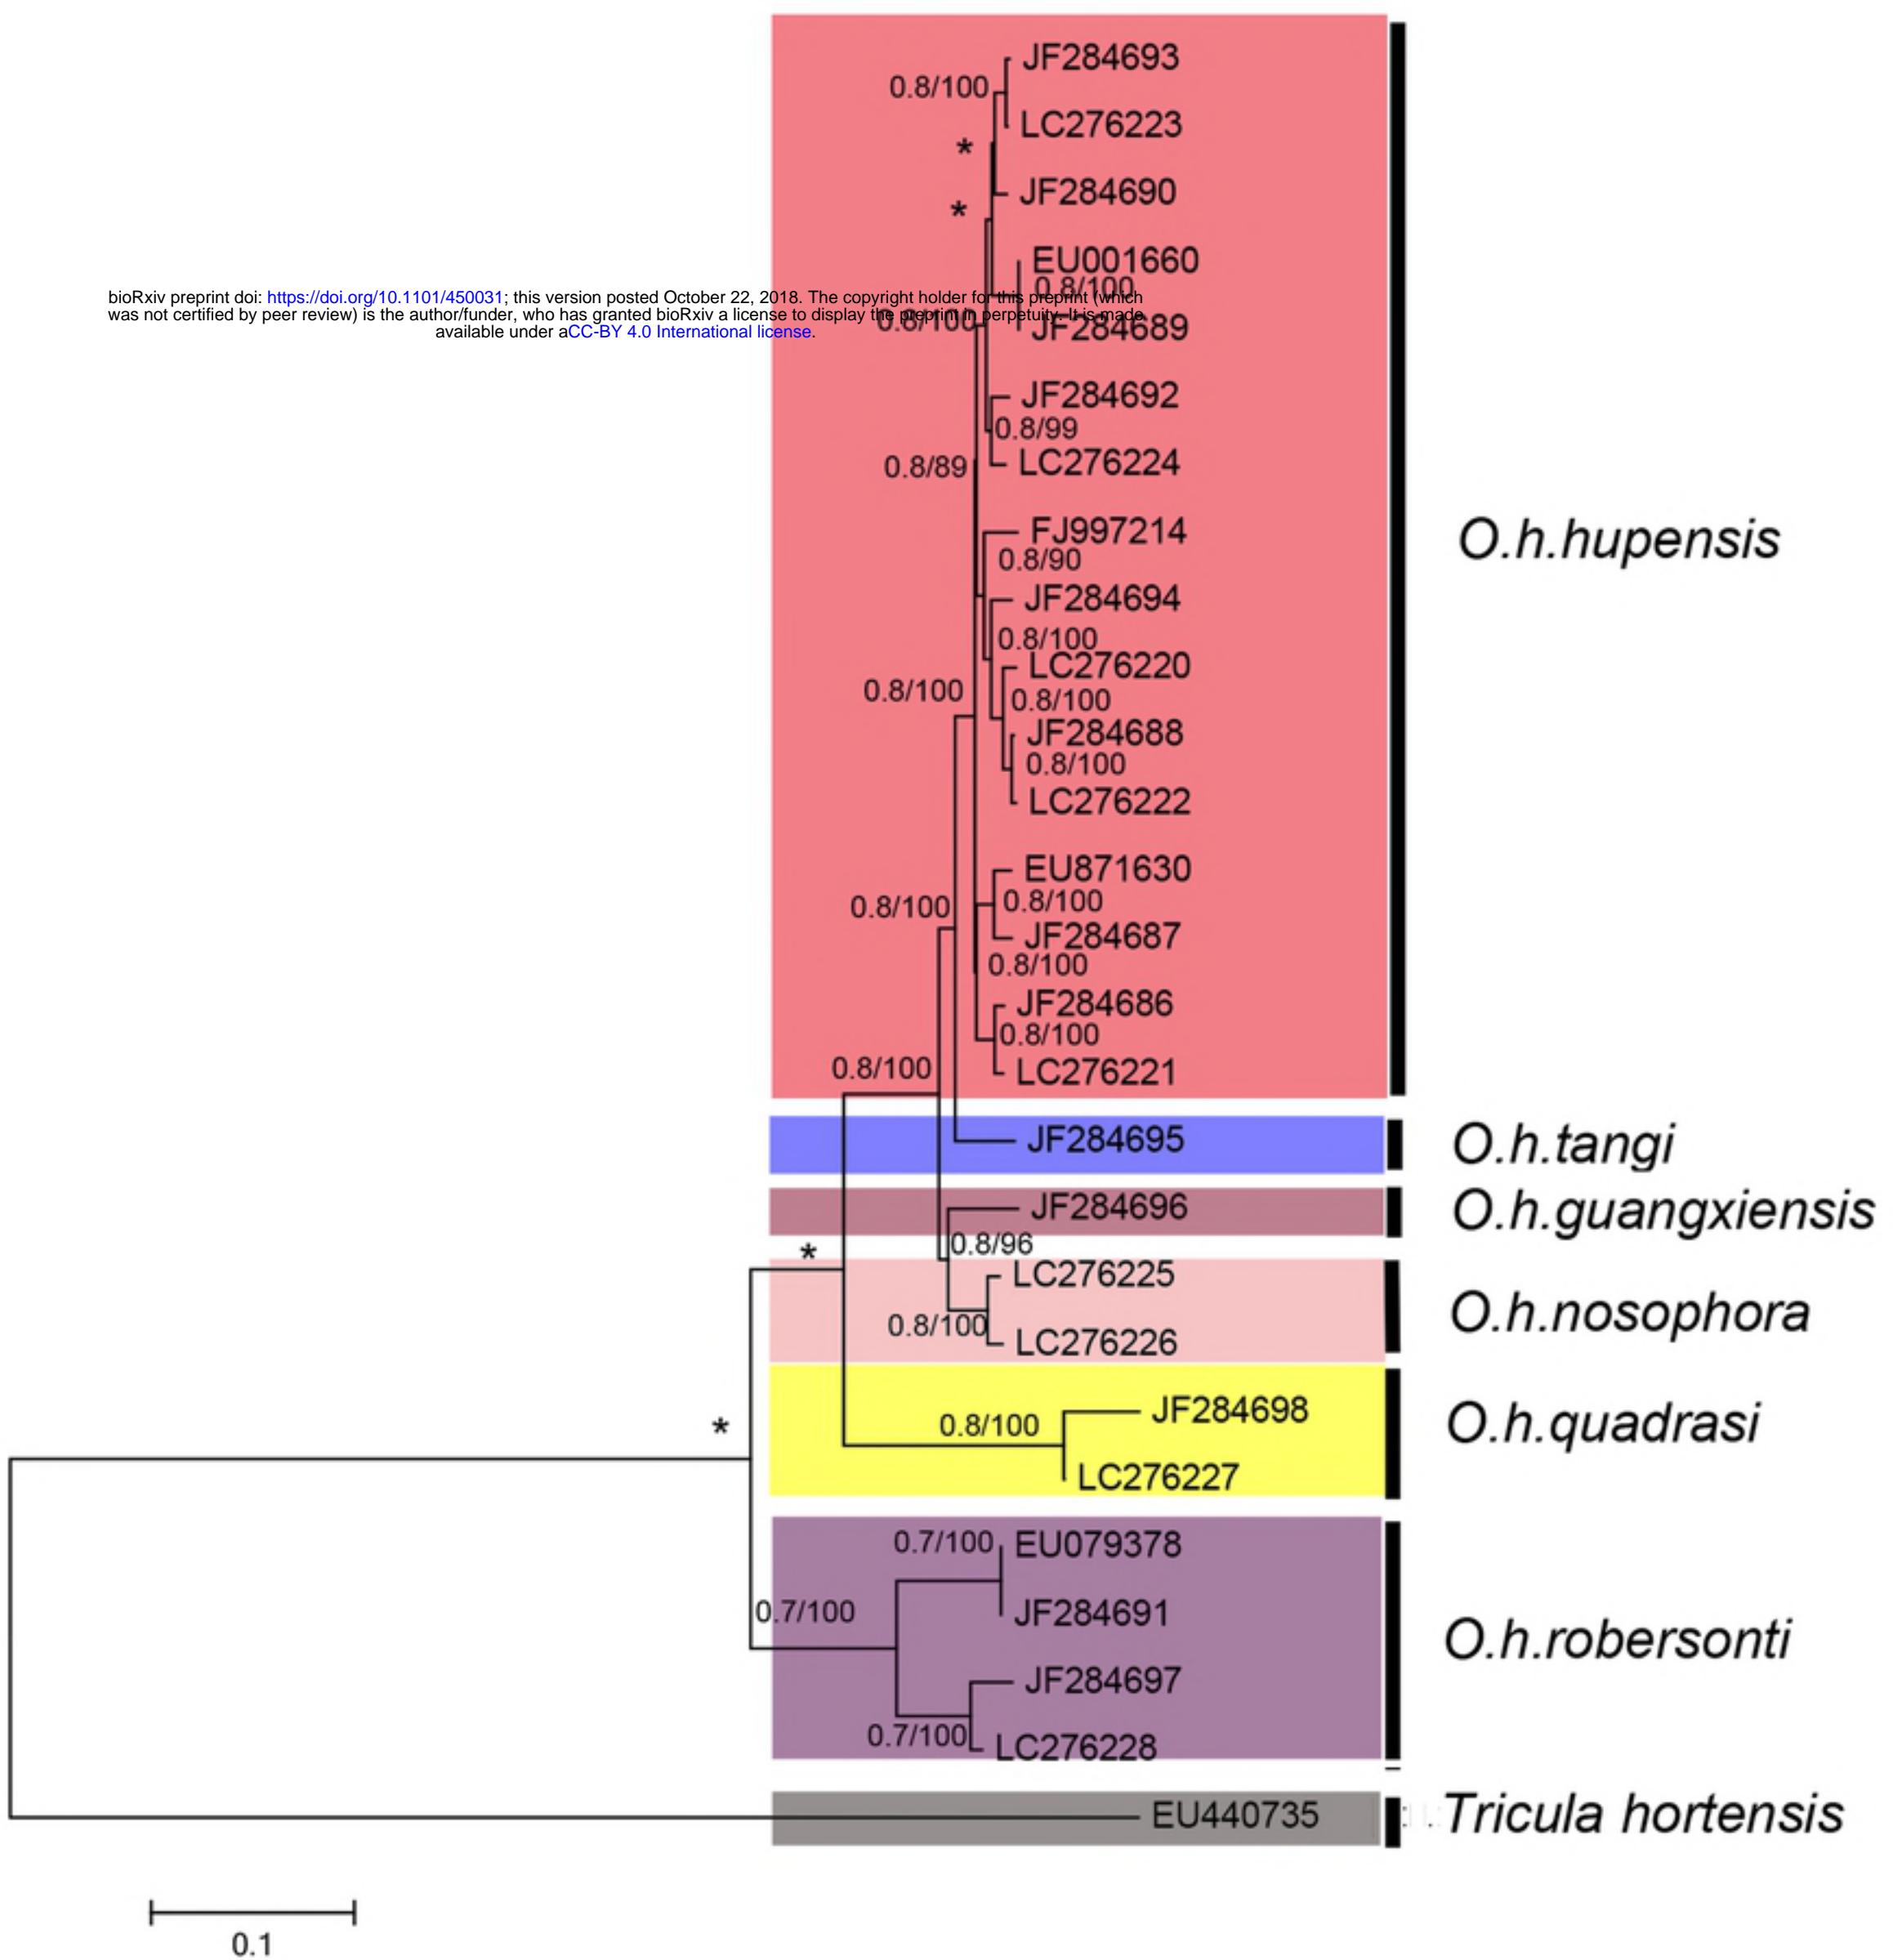

Fig1
